# Supplementary material
Source: PubMed Central journal article supplement (PMC4483145)
Supplement: NIHMS657716-supplement-Supplemental_Figure_2.pdf [file NIHMS657716-supplement-Supplemental_Figure_2.pdf]

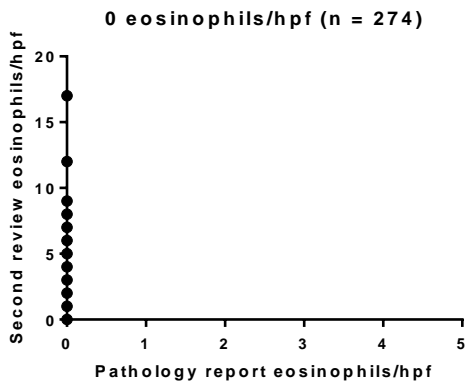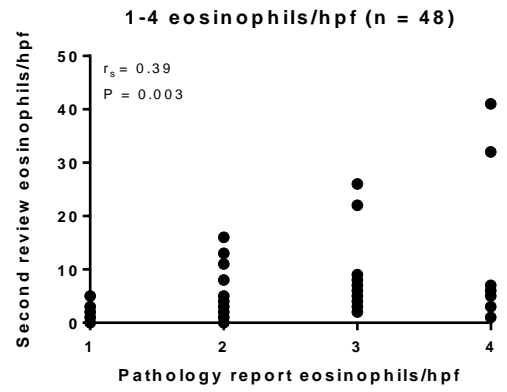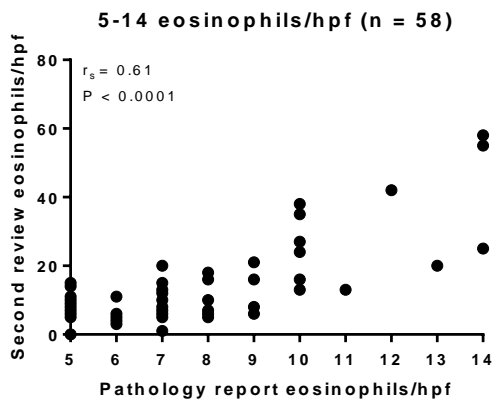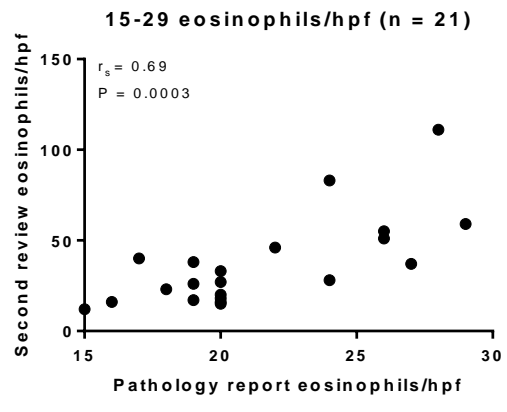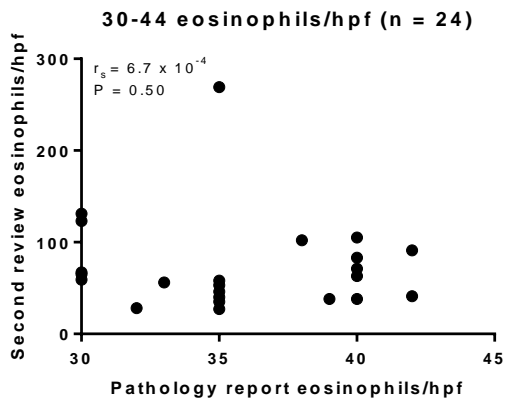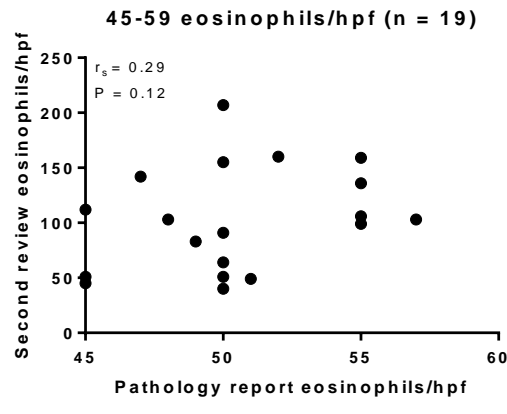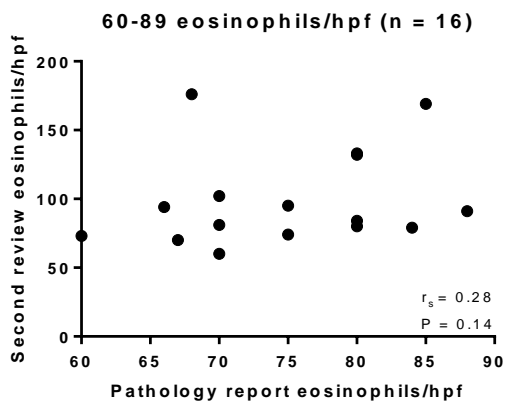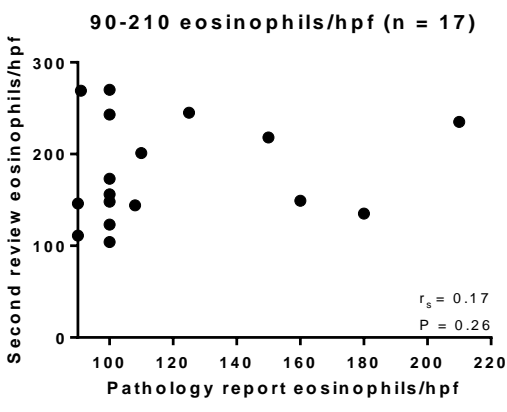

**Supplemental Figure 2. Correlation of pathology report counts and second review counts for all pathology report count ranges.** Spearman correlation coefficient ( $r_s$ ) was calculated for each range.
